# Supplementary material for: Observed global ocean phytoplankton phenology indices
Source: Copernicus journal article supplement (doi:10.5194/essd-2024-21), 2024-02-29
Supplement: Supplementary file [file essd-2024-21-AC3-supplement.pdf]

We thank the reviewers for their insightful comments and time taken to review our manuscript. I apologise for the considerable time that has passed since this first round of revisions, I have recently returned back to work from maternity leave. Please see the responses below in blue.

“Observed global ocean phytoplankton phenology indices.”

## Reviewer 1

This manuscript provides satellite-derived chlorophyll-a data from the Ocean Colour Climate Change Initiative at 4, 9, and 25 km spatial resolutions. The dataset is valuable and can be used in a wide range of research topics and real applications. A few concerns are listed below and the 1 one is the major one.

**1. The accuracy of the data in reflecting the phytoplankton phenology has not been stated with field observation. This is needed to increase the confidence of the satellite-based data. I suggest the author choose a few typic locations with some field survey data and compare the direct observation with your data.**

We thank the reviewer for the comment regarding the accuracy and validation of the underlying data used to generate the phenological indices presented here. This is indeed crucial for ensuring the reliability of the phenological indices. However, we feel it is out of the scope of this study to conduct an independent validation of the OC-CCI data product. This has been done extensively by the European Space Agency (ESA), Ocean Color Climate Change Initiative Team and provided by version 6 documentation (<https://docs.pml.space/share/s/fzNSPb4aQaSDvO7xBNOClw>) and also refer to details in publication: <https://www.mdpi.com/1424-8220/19/19/4285>

For example, see below figure comparing OC-CCI data when matched against the CCI database of in situ data, extracted from OC-CCI v6 documentation (see section 5 from <https://docs.pml.space/share/s/fzNSPb4aQaSDvO7xBNOClw>.)

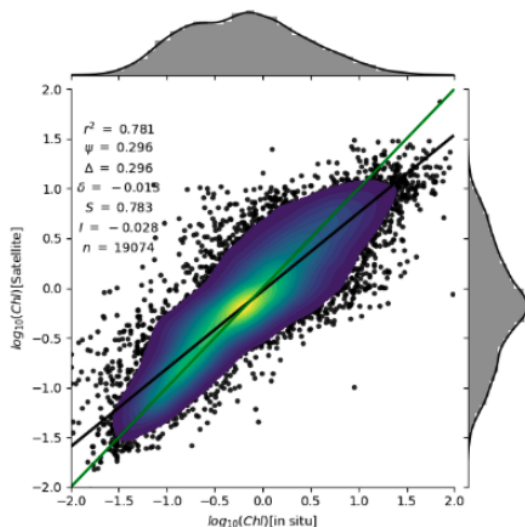

The OC-CCI data are validated, error-characterised Essential Climate Variable products that are widely used and accepted within the scientific community for a range of applications (refer to list of published papers: <https://climate.esa.int/en/projects/ocean-colour/>) that include studies on phytoplankton phenology, primary productivity, and biogeochemical cycles. The dataset's reliability is thus already well-recognized, and numerous studies have utilised OC-CCI data without conducting independent validation, relying instead on the established credibility of the ESA's validation efforts. We note that there are already several independent regional validation efforts of this product for phytoplankton phenology, we select two examples for the tropical ocean <https://www.nature.com/articles/s41598-018-37370-4> and from the subantarctic Southern Ocean: <https://doi.org/10.1093/icesjms/fsv105>. Nevertheless, we do also recognise that these remote sensing satellite products are not perfect and while regionally variable amplitude biases exist, the OC-CCI product was generated with the specific intent to be used for global application to generate long-term system change studies, such as phytoplankton dynamics under climate variability and change. In many such instances, even if there is a regional bias in satellite estimates relative to in situ chlorophyll concentrations, the value of satellite application remains critical for evaluating multi-decadal changes in the characteristics of the seasonal cycle (e.g. in phenology, variability and magnitude) that reflect a biological response to changes in physico-chemical conditions. (refer to <https://www.mdpi.com/1424-8220/19/19/4285>).

That said, we have modified the text of the manuscript to recognise the existence of well documented limitations of satellite remote sensing data products (e.g. regional biases) but also to reflect on efforts made by OC-CCI to generate a data product of value for generating climatologies and assessing variability and change. Refer to additional text for example in the introduction, see italics below, from line 112-127:

*“We note however that despite their obvious spatial and temporal advantages, remotely detected water-leaving radiances emanate from only the first optical depth, and give little quantitative information about the vertical structure of the water column, which can be particularly important in low nutrient regions where a subsurface chl-a maxima is prevalent. In addition, we recognise that the OC-CCI chl-a data product may exhibit regional biases (that can vary in both magnitude and direction) and arise from several factors inherent to both satellite remote sensing technology and the complexities of ocean ecosystems. One example is that algorithms are often regionally trained on datasets from specific parts of the world, which can result in discrepancies when applied globally. Despite these regional biases, satellite ocean colour chl-a data products remain highly valuable, especially when the goal is to identify patterns in the seasonal cycle of phytoplankton and how these patterns evolve over time. While local accuracy may be impacted by biases, the broader trends—such as the timing of spring blooms, the intensity of summer productivity, or the length of growing season—are still well captured. This is because biases tend to be relatively consistent over time in any given region, allowing researchers to focus on changes in these patterns rather than on the absolute values. These long-term changes in the seasonal cycle are crucial for understanding how marine ecosystems respond to environmental stressors like warming temperatures, ocean acidification, and changes in nutrient availability.”*

And to the methodology, refer to additional text in italics, on lines 170-176:

“This version marks a substantial change to previous versions (e.g., v5.0, see Sathyendranath et al., 2021) in that it incorporates Sentinel 3B OLCI data, the MERIS-4<sup>th</sup> reprocessing dataset, upgraded Quasi-Analytical algorithm (QAAv6) and the exclusion of MODIS and VIIRS data after 2019 (refer to D4.2 - Product User Guide for v6.0 Dataset from <https://climate.esa.int/en/projects/ocean-colour/key-documents/> for further details on processing and validation). The OC-CCI observational product was generated with the specific aim of studying phytoplankton dynamics at seasonal to interannual scales. Indeed, it has been used widely by the scientific community for studying phytoplankton phenology (e.g. Ferreira et al., 2021; Gittings et al., 2019, 2021; Racault et al., 2017; Thomalla et al., 2015, 2023). “

2. In the method, a few critical percentage values were used to determine the phytoplankton phenology parameters, e.g., 75% of the amplitude of the bloom maximum peak magnitude, 5% of the chl-a range, 15% of the total cumulative chl-a concentration and of the median rate of change in chl-a concentration. Why do you choose different values as critical points and are there any standards or citations that suggest the use of these values? The reason should be pointed out in the manuscript. For example, three peaks would be detected in Figure 1 if a lower critical value is used

The 5% of the chl-a range, 15% of the total cumulative chl-a concentration and of the median rate of change in chl-a concentration are in accordance with previous literature. The sensitivities of the different percentages chosen have been explored in these other studies already. E.g. see excerpt from Brody et al. 2013: “*The 15% of the cumulative biomass threshold we used produced BSDs more closely aligned with the first increases in chlorophyll biomass, while a 30% threshold would produce BSDs associated with the largest increases in biomass*” and “*We determined that a threshold of 15% of the total biomass (cross) best predicted the bloom initiation date for our study area using two techniques. First, we visually inspected multiple chlorophyll time series over the entire study area with BSDs determined using six thresholds (5–30%). From these time series, we found that thresholds of 10–15% best predicted the bloom initiation date in subtropical regions, while threshold of 15–20% best predicted the bloom initiation date in subpolar regions. We then plotted, for the six thresholds, the number of occurrences in which chlorophyll levels at each threshold's BSD exceeded chlorophyll levels prior to the BSD but were not larger than the yearly chlorophyll median plus one standard deviation. We found that the 15% threshold had the largest number of points with increasing chlorophyll levels at the BSD, which confirmed the results of the visual inspection and led to the choice of the 15% threshold.*”

We have cited the relevant publications where these thresholds are first mentioned in our study:

Lines 277-280:

*“To note, the above percentage thresholds are in accordance with those used by previous phenological detection studies (e.g. Ji et al. 2010, Brody et al., (2013); Hopkins et al., (2015); Thomalla et al., (2011, 2015) and Henson et al., (2018)).”*

The 75% of the amplitude of the bloom maximum peak magnitude, which was used to identify the presence of multiple bloom peaks, was chosen with the objective of identifying

well defined peaks that were similar in magnitude (and within a given range of time) from the main peak. A threshold higher than that ends up not meeting the purpose for counting multiple peaks, whilst a threshold lower than this is catching subseasonal variability. The percentage threshold was chosen over a magnitude based threshold as it remains robust in regions with higher or lower chlorophyll values.

We have added the above explanation into the manuscript, lines 250-255:

*“The 75% threshold was chosen to identify peaks with similar magnitude to the bloom maximum peak so as to allow for the occurrence of a multiple peak growing season. Choosing a threshold higher than this would likely exclude recognisable bloom peaks (which could lead to an underestimate of the bloom duration), while choosing a lower threshold may include sub-seasonal variability and lead to an overestimation of the bloom duration”*

3. Lines 210 to 214, it is not very clear to me, please re-edit to make your idea more clear.

We have edited the relevant lines to be clearer as follows:

*“The cyclical nature of the year day calendar presents a significant challenge when calculating means of phenological indices. For example, we need to avoid a situation where the mean bloom initiation between a year with a bloom in December (day of year = 340) and a year with a bloom in January (day of year = 10) is incorrectly calculated as an average bloom initiation date in July (day of year = 175). To address this, as similarly applied in Thomalla et al. 2023, we used the Python SciPy function circmean, which calculates circular means for samples within a specified range, correctly identifying the mean as day of year 357.”*

4. Line 260, please describe the explanation provided in Brody et al., (2013) shortly here, so that the readers could understand the reason easier and more directly.

We have edited the text from line 260 to include the explanation from Brody et al., 2013:

*“For example, as explained in Brody et al, (2013), the TS method which is based on the range of bloom amplitude (refer to methods) will capture the bloom start dates at the largest increase in chlorophyll concentrations. It is thus more suitable for studies wanting to investigate the match or mismatch between phytoplankton and upper trophic levels as the match-mismatch hypothesis is based on the timing of the high phytoplankton biomass period [Cushing, 1959].”*

5. Figure 3 and the relevant text compare the three detection methods using CoV values, it is not clear if the three methods all differ from each other or only one of them resulted in discrepancy when CoV is large. A conclusive sentence is needed in the text. For example, the comparison between three values in line 312 is very clear that the integrated bloom chl-a climatology (2017-2022) is similar using 9 and 4 km maps, but is different from that determined using a 25 km map.

We thank the reviewer for raising this important point. We have decided to change Figure 3 to the standard deviation of the climatological means of the three methods, which allows an easier interpretation of the magnitude of the differences between the methods.

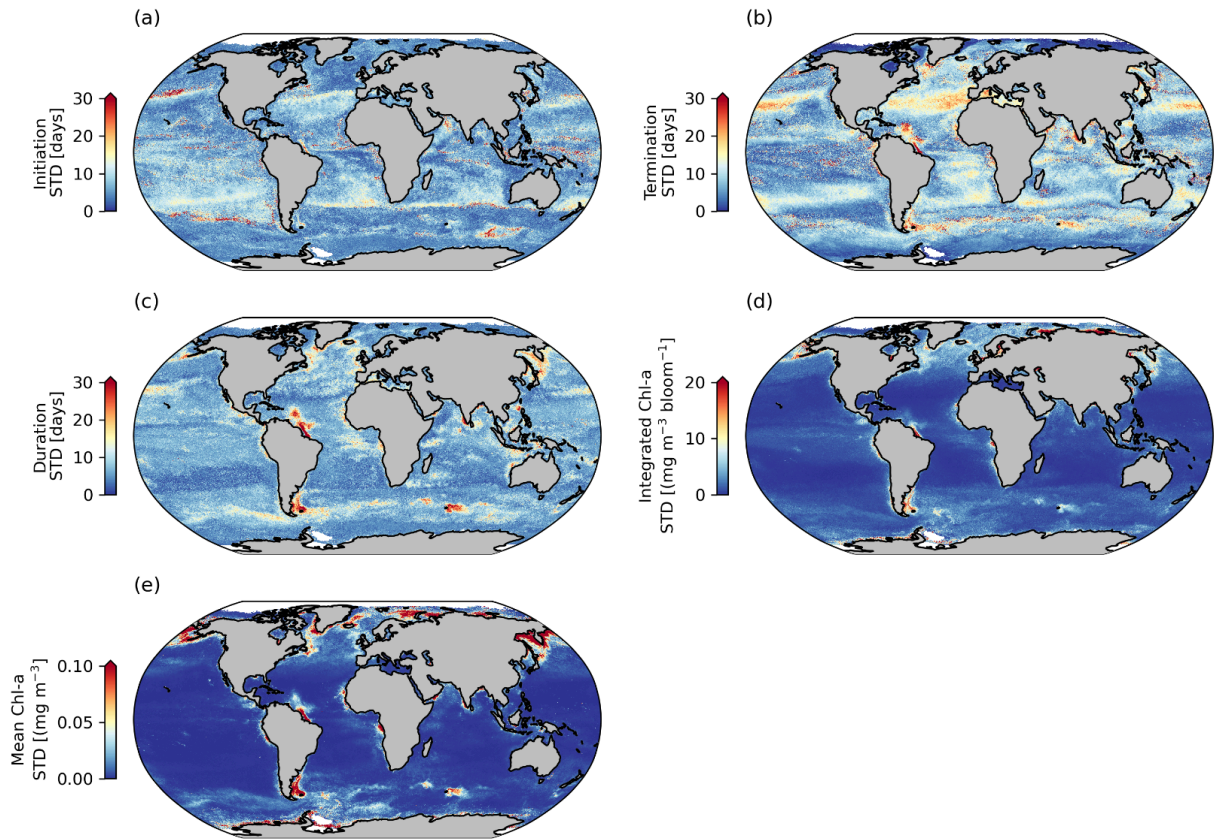

*Figure 3: Comparisons between phenological detection methods. Shown are standard deviations (STD) calculated between the biomass-based threshold method, the cumulative biomass-based threshold method, and the relative of change method, for selected seasonal phytoplankton bloom metrics, including (a) bloom initiation, (b) bloom termination, (c) bloom duration, (d) bloom integrated chl-a and (e) bloom mean chl-a. .*

We have also included an additional figure in the Appendices which provides the climatological means of each method and the differences between them (e.g. TS - RC, TS-CS and CS-RC). This allows the user to have a better understanding of the magnitude of the differences between the methods globally.

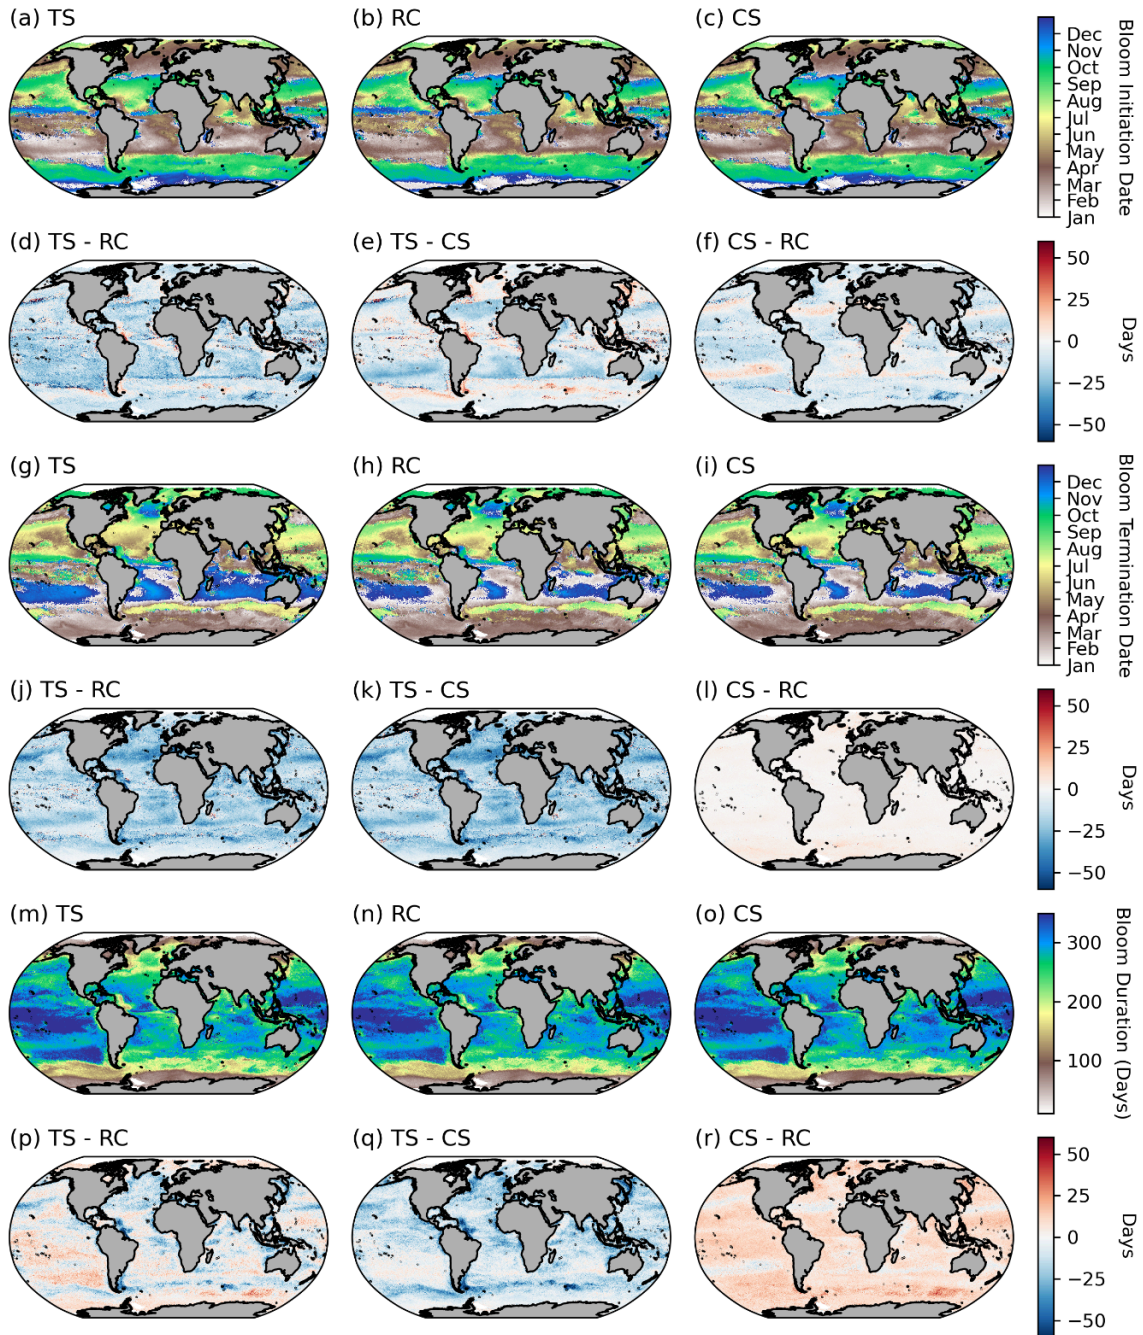

*Figure A2. Comparisons between phenological detection methods. The climatological means [1998 - 2022] for (a-c) bloom initiation, (g-i) bloom termination, and (m-o) bloom duration. The differences between the climatological means for the biomass-based threshold method (TS), the cumulative biomass-based threshold method (CS) and the rate of change method (RC) are provided for bloom initiation (d-f), bloom termination (j-l) and bloom duration (p-r).*

The text of section “3.2 Comparisons of phenology detection methods” has thus been substantially revised to reflect the changes to the figures. We have also included a bit more discussion around the disagreements of the methods. For example, refer to added text in section 3.2

*“In general, there is stronger agreement between methods in the higher subpolar latitudes compared to subtropical latitudes, as evidenced by slightly elevated STDs in the subtropical gyres (Figure 3a,b). The subtropical oligotrophic regions are characterised by phytoplankton seasonal cycles that typically have lower bloom amplitudes, are more gradual and have longer duration (Figure 2). The TS method tends to produce earlier bloom initiations and earlier terminations in these subtropical regions (Figure A2 d-e, j-k). In these regions the chl-a min-max range is relatively small, thus a 5% threshold may be exceeded earlier in both termination and initiation. While, on the other hand the RC method, based on the rate of change, is likely to produce later bloom timings dates in more gradual blooms”*

*“Unsurprisingly, in the oligotrophic regions, differences between the methods in bloom duration do not translate to large differences in the integrated and mean bloom chlorophyll because of the low magnitude of the chlorophyll (Figure 1a-c, Figure 3 c-e). There are, however, corresponding regions of larger disagreements in duration and mean and integrated bloom chlorophyll, for example in energetic regions of the Antarctic Circumpolar Current, particularly near sub-Antarctic Islands, and localised coastal regions with significant river runoff, such as in the Atlantic where the Amazon River discharge occurs. These areas of large STDs between the methods are driven predominantly by the TS method (Figure A2p-r), which tends to result in shorter blooms, due to later initiations and earlier terminations (Figure A2 d, e, in these above-mentioned locations.*

*”*

## **Reviewer 2**

This work documents the process of creation of a dataset of phenological indexes of phytoplankton blooms on the global ocean, using the 26-years timeseries of the satellite-derived chlorophyll gathered by the OCCCI. The dataset could be potentially useful to feed other analysis. However, in its current state I see two main weaknesses, it is not validated (1), and it does not provide error estimates (2).

### General comments

1. The manuscript shows, technically speaking, a great data analysis. The authors have done a rigorous job collecting data, filling gaps and applying globally-appropriate bloom detection methods. Their results look very neat, and it would be very interesting to see a deeper analysis. However, I do not see so clear the potential of these data being useful in the future to other scientists and therefore being published as an ESSD dataset.

We thank the reviewer for this critical feedback with regards to the usefulness of the global multi-year product of phytoplankton phenology presented here. There are a number of reasons why these data are useful for scientists and other practitioners, which we reiterate here. Phytoplankton form the base of the marine food web, they are highly sensitive to changes in physico-chemical conditions, such that long-term phenology datasets can help understand how phytoplankton are responding to environmental changes (sea temperature, ice cover, light availability, nutrients etc.). These changes in phenology may have cascading impacts on the entire ecosystems (fish populations, mammals and birds), thus monitoring

phenological changes can provide early warnings of ecosystem shifts or decline in ecosystem health. Phenology data can be used to inform fisheries scientists and management by predicting the timing and extent of primary production, which supports fish stocks. Understanding phytoplankton phenology can help improve earth system models with respect to carbon sequestration and nutrient cycling, this is crucial for predicting future changes in marine environments and for making informed policy decisions. It is also important to recognise that the generation and continuation of this product is extremely computationally expensive. Not everyone (or country) has the access to compute resources required to generate this product to support their studies and/or to use in ecosystem management, particularly those from the global south where access to HPC resources can be limited.

We hope that the modifications and below additional text incorporated into the introduction of the manuscript will help to clarify the value of such a data set to multiple users. Refer to italics text for additions:

Lines 93-96:

*“Having access to a global data product that characterises the seasonal cycle of phytoplankton over the last 25 years and into the future can thus provide a valuable tool to users that require an understanding of key aspects of the growing season and how these may be changing over time.”*

Lines 125-127:

*“These long-term changes in the seasonal cycle are crucial for understanding how marine ecosystems respond to environmental stressors like warming temperatures, ocean acidification, and changes in nutrient availability.”*

Lines 150-154 , refer to italic text:

*In addition, a phenology data product such as this can provide a useful aid for the planning of oceanographic research campaigns that wish to align with or determine their occupation relative to key aspects of the growing season. Finally, this derived observational data product could also be valuable to support those users without the programming know-how or access to computationally expensive resources that are required to generate it*

Lines 158-159:

*The data product facilitates the global characterisation of the climatological seasonal cycle and can be used to identify the sensitivity of the seasonal cycle to change (through the analysis of trends and anomalies).*

The OCCC1 Chl-a is itself a satellite-derived product, based on the disaggregation of the world ocean in a certain number of optically-homogeneous water classes. However, global algorithms, even blending different waterclasses, do not compare necessarily well to observations in certain regions, where regional algorithms are proposed (e.g. Johnson *et al.* 2013 in the Southern Ocean [<https://doi.org/10.1002/jgrc.20270>]; Volpe *et al.* 2019 in the



Mediterranean Sea [<https://doi.org/10.5194/os-15-127-2019>]). To the best of my knowledge OCCI do not consider regional-specific algorithms.

And on top of that it is the uncertainty of the phenological analysis performed (which is also not very well documented, see my next comment). With such level of derivation I do not see how these metrics provided could be considered observed data. This issue could be overcome if the authors present some comparison to in situ observations of Chl-a timeseries, observed phenology or other common standards, but that is not done in the current version. Have the different bloom detection methods been validated with observational data on their own? Since obtaining global-scale validation data could be challenging, maybe one option is to perform a more formal analysis on the agreement/disagreement among methods considering in which temporal/spatial domain they have been validated independently.

We appreciate the reviewer's comments regarding the use of the OC-CCI data in our phenological analysis. We fully acknowledge that the OC-CCI Chl-a is a satellite-derived product and that its derivation is calculated by blending algorithms based on optical water type and that regional biases may still occur. However, in the absence of a single unifying algorithm applicable to all optical satellite sensors and across all marine environments, the optical water type methodological framework used by the OC-CCI currently provides the only viable solution for dealing with long-term, multi-sensor datasets at a global scale. While we understand that global algorithms may not always align perfectly with regional observations, the OC-CCI have put considerable effort into defining the per-pixel and regional uncertainties associated with each of their products, as well as highlighting currently under-represented regions (e.g. regions with lower cumulative water class membership in <https://www.sciencedirect.com/science/article/pii/S0034425717301396#f0025> ). We would also note that regional validation assessments do not always agree, with outcomes that are strongly dependant on the strictness of the match up criteria being implemented (in both time and space) and the methodology being used to determine the in situ concentrations used in the comparison (e.g. HPLC versus acetone extracted fluorometric chlorophyll). As an example, we refer the reviewer to <https://www.mdpi.com/2072-4292/11/15/1793>. Nevertheless, even if susceptible to regional bias, this does not make the application of a satellite remote sensing data product inappropriate for characterising the phenology of the climatological seasonal cycle or the characteristics of variability (e.g. Thomalla et al., 2011, Tang et al., 2021, Hauko et al. 2021) or to detect trends in any of these seasonal metrics (e.g. Silva et al. 2021, Anjaneyan et al. 2023, Delgado et al. 2023, Thomalla et al., 2023).

We have added the following text into the introduction which highlights some of these limitations, see italics below, from line 112-127:

*“We note however that despite their obvious spatial and temporal advantages, remotely detected water-leaving radiances emanate from only the first optical depth, and give little quantitative information about the vertical structure of the water column, which can be particularly important in low nutrient regions where a subsurface chl-a maxima is prevalent. In addition, we recognise that the OC-CCI chl-a data product may exhibit regional biases (that can vary in both magnitude and direction) and arise from several factors inherent to both satellite remote sensing technology and the complexities of ocean ecosystems. One example is that algorithms are often regionally trained on datasets from specific parts of the world,*

*which can result in discrepancies when applied globally. Despite these regional biases, satellite ocean colour chl-a data products remain highly valuable, especially when the goal is to identify patterns in the seasonal cycle of phytoplankton and how these patterns evolve over time. While local accuracy may be impacted by biases, the broader trends—such as the timing of spring blooms, the intensity of summer productivity, or the length of growing season—are still well captured. This is because biases tend to be relatively consistent over time in any given region, allowing researchers to focus on changes in these patterns rather than on the absolute values. These long-term changes in the seasonal cycle are crucial for understanding how marine ecosystems respond to environmental stressors like warming temperatures, ocean acidification, and changes in nutrient availability.”*

With regards to concerns around the validation of OC-CCI satellite observations with independent in situ measurements, we refer the reviewer to the first response to Reviewer 1 above, which highlights the credibility of ESA's validation efforts and the numerous studies that have utilised OC-CCI data without conducting independent validation, including for applications that determine bloom phenology. It is similarly beyond the scope of this data product submission to globally validate the different bloom detection methods. Suffice to say that these different methods are well documented and have been applied over many years to different data streams (e.g. chlorophyll from satellites, gliders, floats, moorings) and in many different ocean regions (Ji et al. 2010, Racault et al. 2012, 2014, Brody et al. 2013, Thomalla et al. 2015, 2023, Gittings et al. 2019, 2021, Ferreira et al. 2021, Silva et al. 2021). We do however recognise that different methods are more or less sensitive to different characteristics of the time series (e.g. to rapid adjustments in rates of change or inflection points etc.) such that they have a tendency to select different dates for initiation/ termination etc. It is for this reason that we apply three different (well documented) approaches for detecting bloom phenology. This allows the user the ability to assess the similarities or differences between different detection methods for their region of interest. Applying all three methods allows the user to discern which method is most appropriate to their region OR to use all three methods to provide a range of variability for each bloom metric. We have provided more discussion on where and when the different methods disagree on a global scale and by how much. We have revised Figure 3 and included an additional Figure A2 added to Appendices, and also request that you please refer to our response to comment 5 from Reviewer 1 above.

Regarding the comment on whether these phenological metrics should even be considered observed data. It is our understanding that satellite data are generally considered a remote sensing observation. However, we recognise the reviewers' concerns that having undergone so much processing these measurements could easily be considered a derived product. In an attempt to address this concern the first time we use OC-CCI satellite remote sensing we now refer to it as an “observational data product”, while for the phenology metrics that we derive from this observational product we now refer to them as “derived observational data products”.

2. The quality of the presentation is high. The dataset is accessible and straightforward to interpret. However, another big concern is that the dataset does not include any estimate of error associated to the metrics given. It is of utmost importance to provide such an error,

considering that the trends on such metrics seem to be on the range of 5-10 days per decade. Dispersion metrics around the mean for each pixel (in the 9km and 25km versions) are also missing. I think these can be provided since phenology indexes are computed in the 4km version and later regridded (L115). There is no discussion about the potential sources of errors and limitations of the bloom detection methods, only references to other works (L135). Maybe the authors could mention the potential caveats of the methods when they elaborate on the agreement/disagreement between methods (L267).

We thank the reviewer for raising this important concern regarding the absence of error estimates in the phenological metrics derived from the OC-CCI chl-a dataset. While it is challenging to provide meaningful error estimates for the phenological timing metrics generated from the OC-CCI observational product, we do recognise the importance of including the uncertainty, which will support more reliable results and ultimately strengthens the data product towards more informed decision making regarding the management and preservation of ocean ecosystems (see Werther et al. 2023).

There are multiple approaches available to address the uncertainty in a phenological data product. In our case, we had purposefully chosen to provide the users with three different detection methods, each applied to three resolutions: the native 4 km and regridded 9 km and 25 km. This results in nine unique realisations for each phenological metric for any given region globally. This was done in response to recognising that the different detection methods have different strengths and weaknesses and that the regridding of chlorophyll-a data introduces additional variability. These factors can cause some variability in the phenological outcomes, giving the users insight into differences stemming from methodological and/or resolution choices. To provide estimates of methodological uncertainty, we could have opted to instead vary the thresholds applied and used a single detection method, which has been done by several other studies already (Siegal et al. 2002, Brody et al, 2013). Siegal et al. 2002 note that *"Little quantitative differences in the resulting computations were found using thresholds ranging from 1 to 30%"*. Instead, we have chosen to provide three different detection methodologies with fixed thresholds (using values recommended by the literature for global applications) and focus rather on the inter-method differences, which will likely drive larger and possibly more meaningful discrepancies in the phenology metrics, than would be introduced by simply adjusting the threshold values.

Another approach could be to explore the uncertainties associated with the underlying chlorophyll data product. The OC-CCI observational product provides per pixel "uncertainty" metrics for chl-a (Jackson et al., 2017), however, it is important to note, that these uncertainty metrics are only as good as the in situ data available and likely have implicit biases themselves (Sathyendranath et al. 2019). We feel that a focus on the uncertainties driven by the phenology detection methods is more appropriate than propagating the uncertainties of the chlorophyll-a data product into the phenology detection itself. A true estimate of uncertainty requires a database of in-situ measured phytoplankton phenology to assess the validity of the timing match-ups. Unfortunately an in-situ global data set of comparable spatial and temporal variability to the phenology data product provided here does not yet exist.

We propose instead to incorporate the inter-methodology uncertainty metrics for each published phenology dataset (e.g. in the 25 km, 9 km and 4 km products). For each bloom metric (initiation, termination, duration, bloom amplitude) we present three results, one for

each methodology. With this we are able to generate an absolute range for each metric (across the different methods). This additional information will allow the user to access information on the agreement or disparity between different detection methods. And by providing the inter-method standard deviation the user will gain an additional sense of spread between the different methods. We hope that by providing these additional uncertainty metrics we will increase the value of this data product to support user application.

Regarding the requested dispersion metrics for bloom phenology indices, it is our understanding that this is not possible in the instance described by the reviewer because the remotely sensed chlorophyll data is first regridded from the 4 km to the 9 km and 25 km resolution and only then are the phenological metrics calculated for the regridded chlorophyll data. See excerpt: "*The phenological indices described below are calculated using three horizontal resolutions in surface chl-a, the native 4 km resolution as provided by OC-CCI and a regridded 9 km and 25 km horizontal resolution.*" Thus, we cannot do dispersion metrics as the phenology data is calculated from the gridded chlorophyll, and we end up with only one value (e.g. the date of bloom initiation) per pixel (4 km, 9 km or 25 km) per year. However, as discussed above, the dispersion metrics for the different methods for a given resolution, as shown by standard deviation of methods for the 25 km resolution as in updated Figure 3 will now be provided in an updated dataset.

We have expanded the discussion in Section 3.2 regarding the inter-model differences highlighting the strengths and weaknesses of different methods and included Figure A2, which compares the individual methods to one another.

#### **References noted above:**

Anjaneyan et al. (2023) Spatio-temporal changes of winter and spring phytoplankton blooms in Arabian sea during the period 1997–2020 <https://doi.org/10.1016/j.jenvman.2023.117435>

Delgado, A. L., Hernández-Carrasco, I., Combes, V., Font-Muñoz, J., Pratolongo, P. D., & Basterretxea, G. (2023). Patterns and trends in Chlorophyll-a concentration and phytoplankton phenology in the biogeographical regions of Southwestern Atlantic. *Journal of Geophysical Research: Oceans*, 128, e2023JC019865. <https://doi.org/10.1029/2023JC019865>

Ferreira, A., Brotas, V., Palma, C., Borges, C., and Brito, A. C.: Assessing Phytoplankton Bloom Phenology in Upwelling-Influenced Regions Using Ocean Color Remote Sensing, *Remote Sensing* 2021, Vol. 13, Page 675, 13, 675, <https://doi.org/10.3390/RS13040675>, 2021.

Gittings, J. A., Raitzos, D. E., Kheireddine, M., Racault, M. F., Claustre, H., and Hoteit, I.: Evaluating tropical phytoplankton phenology metrics using contemporary tools, *Sci Rep*, 9, <https://doi.org/10.1038/s41598-018-37370-4>, 2019.

Gittings, J. A., Raitzos, D. E., Brewin, R. J. W., and Hoteit, I.: Links between phenology of large phytoplankton and fisheries in the northern and central red sea, *Remote Sens (Basel)*, 13, 1–18, <https://doi.org/10.3390/rs13020231>, 2021b.

Hauko et al. (2021) Phenology and Environmental Control of Phytoplankton Blooms in the Kong Håkon VII Hav in the Southern Ocean <https://doi.org/10.3389/fmars.2021.623856>

Jackson, Shubha Sathyendranath, Frédéric Mélin et al (2017). An improved optical classification scheme for the Ocean Colour Essential Climate Variable and its applications <https://doi.org/10.1016/j.rse.2017.03.036>

Ji, R., Edwards, M., MacKas, D. L., Runge, J. A., and Thomas, A. C.: Marine plankton phenology and life history in a changing climate: Current research and future directions, *J Plankton Res*, 32, 1355–1368, <https://doi.org/10.1093/plankt/fbq062>, 2010.

Moutier, W.; Thomalla, S.J.; Bernard, S.; Wind, G.; Ryan-Keogh, T.J.; Smith, M.E. Evaluation of Chlorophyll-a and POC MODIS Aqua Products in the Southern Ocean. *Remote Sens*. 2019, 11, 1793. <https://doi.org/10.3390/rs11151793>

Racault, M. F., Le Quéré, C., Buitenhuis, E., Sathyendranath, S., and Platt, T.: Phytoplankton phenology in the global ocean, *Ecol Indic*, 14, 152–163, <https://doi.org/10.1016/j.ecolind.2011.07.010>, 2012.

Racault, M. F., Sathyendranath, S., and Platt, T.: Impact of missing data on the estimation of ecological indicators from satellite ocean-colour time-series, *Remote Sens Environ*, 152, 15–28, <https://doi.org/10.1016/J.RSE.2014.05.016>, 2014.

Rubao Ji, Martin Edwards, David L. Mackas, Jeffrey A. Runge, Andrew C. Thomas, Marine plankton phenology and life history in a changing climate: current research and future directions, *Journal of Plankton Research*, Volume 32, Issue 10, October 2010, Pages 1355–1368, <https://doi.org/10.1093/plankt/fbq062>

Thomalla, Marie-Fanny Racault, Sebastiaan Swart, Pedro M. S. Monteiro, High-resolution view of the spring bloom initiation and net community production in the Subantarctic Southern Ocean using glider data, *ICES Journal of Marine Science*, Volume 72, Issue 6, July/August 2015, Pages 1999–2020, <https://doi.org/10.1093/icesjms/fsv105>

Thomalla, S. J., Nicholson, S. A., Ryan-Keogh, T. J., and Smith, M. E.: Widespread changes in Southern Ocean phytoplankton blooms linked to climate drivers, *Nature Climate Change* 2023 13:9, 13, 975–984, <https://doi.org/10.1038/s41558-023-01768-4>, 2023

Silva et al. 2021 Twenty-One Years of Phytoplankton Bloom Phenology in the Barents, Norwegian, and North Seas <https://doi.org/10.3389/fmars.2021.746327>

Tang, W., Lloret, J., Weis, J. et al. Widespread phytoplankton blooms triggered by 2019–2020 Australian wildfires. *Nature* 597, 370–375 (2021). <https://doi.org/10.1038/s41586-021-03805-8>

Werther, M. Burggraaff, O. Dive Into the Unknown: Embracing Uncertainty to Advance Aquatic Remote Sensing. *J Remote Sens*. 2023;3:0070.DOI:10.34133/remotesensing.0070
